# Supplementary material for: Remarkable stability of unmodified GaAs photocathodes during hydrogen evolution in acidic electrolyte
Source: Royal Society of Chemistry journal article supplement (doi:10.1039/c5ta07648j), 2015-11-25
Supplement: c5ta07648j1.pdf [file c5ta07648j1.pdf]

## Supplemental Information

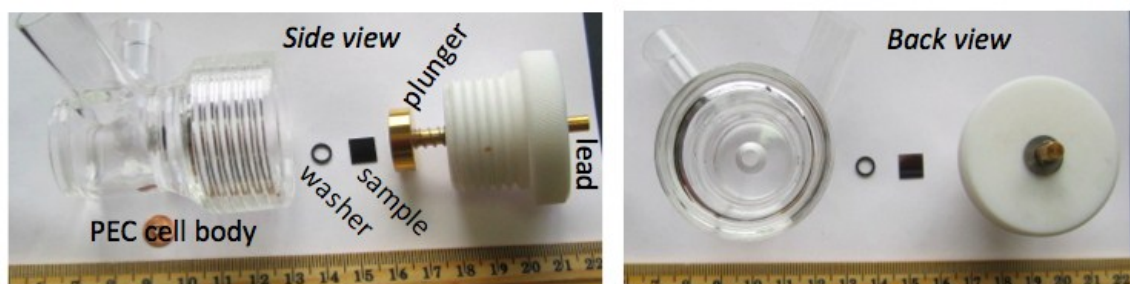

**Fig. S1** PEC compression cell

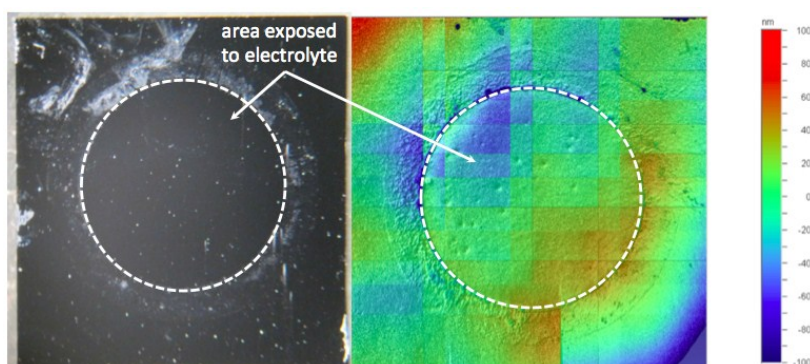

**Fig. S2** Stereo microscope image (left) and optical profilometry (right) of p-GaAs after 96 hours in 3M sulfuric acid at open circuit. The area exposed to the electrolyte is enclosed by the dashed white circle.

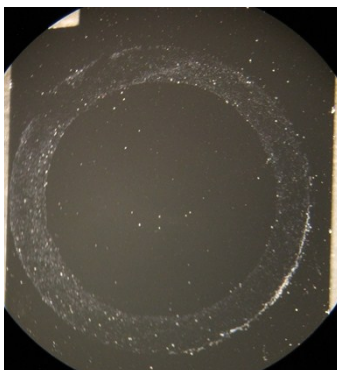

**Fig. S3:** Stereo microscope image of sample after 24 hours durability test showing a specular surface without any observable corrosion features.

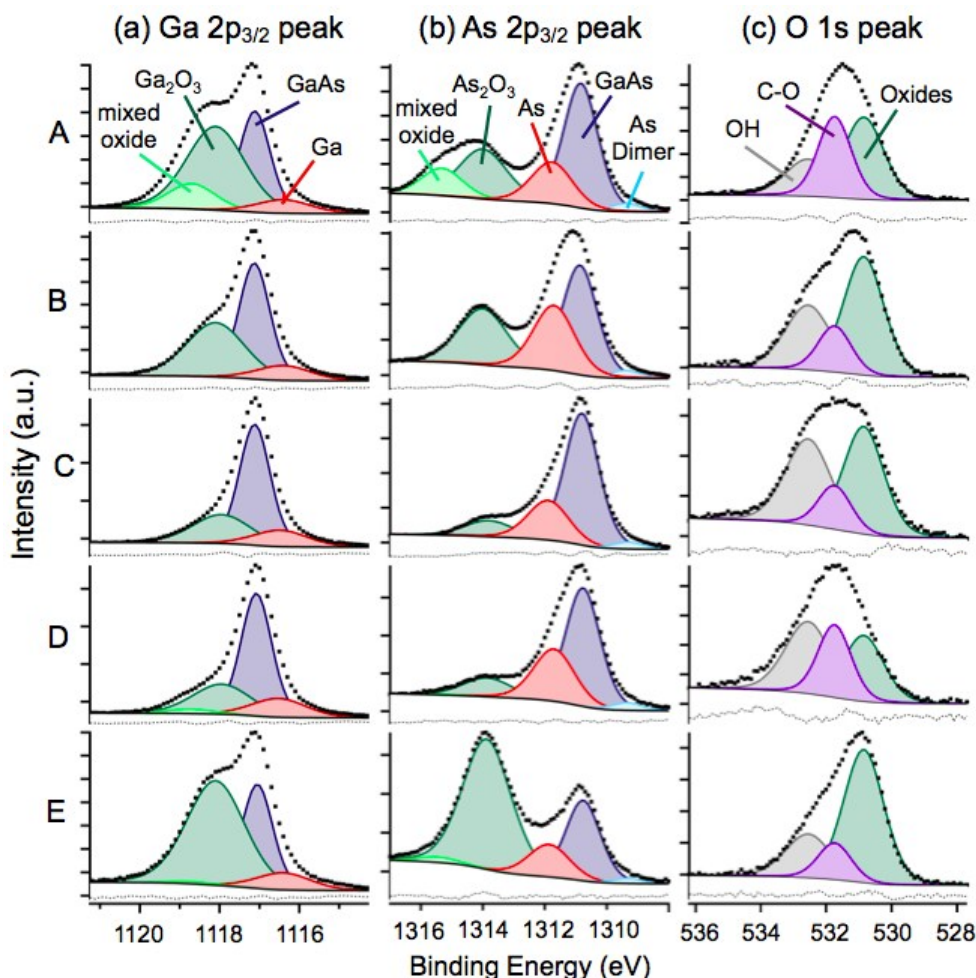

**Fig. S4** Full XPS spectra of the (a) Ga 2p<sub>3/2</sub> (b) As 2p<sub>3/2</sub> and (c) O 1s peaks are shown in three columns with the curve fitting and feature assignments. The five rows, labeled A-E, correspond to samples A (solvent wash), B (1 hr electrolyte soak), C (1 hr durability test), D (24 hr durability test), and E (96 hr durability test).

**Additional description for Figure S4:** Four Ga peaks were included in the model, corresponding to elemental Ga (1116.4 eV), GaAs lattice (1117.1 eV), Ga<sub>2</sub>O<sub>3</sub> (1118.0 eV), and a mixed oxide (1118.7 eV) [1]. The As 2p<sub>3/2</sub> spectra are fit with five peaks including As dimers (1321.3 eV), lattice As (1322.7 eV), As<sup>0</sup> (1323.7 eV), As<sub>2</sub>O<sub>3</sub> (1325.8 eV) and a mixed oxide (1327.2 eV). The As 2p<sub>3/2</sub> peak near (1321.3 eV) is tentatively assigned to As surface dimers following similar As 3d spectral features. The mixed oxide Ga 2p<sub>3/2</sub> peak (1118.7 eV) and As 2p<sub>3/2</sub> peak (1327.2 eV) are native oxide, which is removed once soaked in the electrolyte. The O 1s spectra are fit using three peaks assigned to surface oxides (530.9 eV), C-O bonds (531.7 eV), and hydroxyl groups (532.6 eV) [2]. Surface oxide contributions to the O 1s spectral regions are observed to trend with the Ga<sub>2</sub>O<sub>3</sub> and As<sub>2</sub>O<sub>3</sub> in the Ga 2p<sub>3/2</sub> and As 2p<sub>3/2</sub> regions respectively. The C-O and O-H peaks are observed to increase and decrease with the total carbon content indicating that these are due to residual surfactant Triton X-100, which has both C-O bonds and hydroxyls (product information sheet for Triton X-100 available at Sigma: [https://www.sigmaaldrich.com/content/dam/sigmaaldrich/docs/Sigma/Product\\_Information\\_Sheet/1/t8532pis.pdf](https://www.sigmaaldrich.com/content/dam/sigmaaldrich/docs/Sigma/Product_Information_Sheet/1/t8532pis.pdf)).

**Table S1:** GaAs surface composition determined by XPS. Relative peak areas reported for each spectral region.

| XPS region       | Ga 2p <sub>3/2</sub> |                                |              |              | As 2p <sub>3/2</sub> |                                |              |              |                   | O 1s  |       |                  |
|------------------|----------------------|--------------------------------|--------------|--------------|----------------------|--------------------------------|--------------|--------------|-------------------|-------|-------|------------------|
| Peak assignment  | mixed oxide          | Ga <sub>2</sub> O <sub>3</sub> | Lattice GaAs | Elemental Ga | mixed oxide          | As <sub>2</sub> O <sub>3</sub> | Elemental As | Lattice GaAs | As surface dimers | O-H   | C-O   | Ga and As oxides |
| Peak energy (eV) | 1118.7               | 1118                           | 1117.1       | 1116.4       | 1327.2               | 1325.8                         | 1323.7       | 1322.7       | 1321.3            | 532.6 | 531.7 | 530.9            |
| Solvent wash     | 12                   | 49                             | 31           | 7            | 12                   | 25                             | 17           | 44           | 2                 | 22    | 35    | 43               |
| 1 hr soak        | 3                    | 39                             | 47           | 11           | 0                    | 29                             | 28           | 40           | 2                 | 32    | 17    | 51               |
| 1 hr durability  | 0                    | 27                             | 59           | 14           | 0                    | 11                             | 23           | 63           | 2                 | 41    | 15    | 44               |
| 24 hr durability | 3                    | 26                             | 56           | 15           | 1                    | 13                             | 28           | 56           | 2                 | 39    | 29    | 32               |
| 96 hr durability | 1                    | 59                             | 31           | 9            | 1                    | 60                             | 12           | 26           | 1                 | 23    | 14    | 62               |

### Supplemental Information References

- [1] C. L. Hinkle, M. Milojevic, B. Brennan, a. M. Sonnet, F. S. Aguirre-Tostado, G. J. Hughes, E. M. Vogel, and R. M. Wallace, "Detection of Ga suboxides and their impact on III-V passivation and Fermi-level pinning," *Appl. Phys. Lett.*, vol. 94, no. 16, pp. 1–4, 2009.
- [2] C. D. Wagner, D. A. Zatko, and R. H. Raymond, "Use of the oxygen KLL Auger lines in identification of surface chemical states by electron spectroscopy for chemical analysis," *Anal. Chem.*, vol. 52, no. 9, pp. 1445–1451, 1980.
